# Supplementary material for: RNA Sequencing of Trigeminal Ganglia in Rattus Norvegicus after Glyceryl Trinitrate Infusion with Relevance to Migraine
Source: PLoS One. 2016 May 23;11(5):e0155039. doi: 10.1371/journal.pone.0155039 (PMC4877077; doi:10.1371/journal.pone.0155039)
Supplement: S1 Table — (XLSX) [file pone.0155039.s005.xlsx]

## Sheet: deseq2
ensembl_gene_id	gene_symbol	lrt_test_q_val	lfc_30_vs_0	lfc_90_vs_0
ENSRNOG00000047706	Rt1-a3	2.18689e-13	0.749391	0.59826
ENSRNOG00000013389	Rgs7bp	3.09523e-07	-0.294585	0.259579
ENSRNOG00000030712	Rt1-a2	1.39268e-06	-0.503109	-0.534495
ENSRNOG00000031299	Rps10	0.000281418	0.413942	-0.0689256
ENSRNOG00000007387	Per1	0.00124316	0.358904	0.404422
ENSRNOG00000003219	Trim16	0.00752976	-0.0823814	0.334643
ENSRNOG00000048273	Apod	0.00752976	0.299392	0.0144431
ENSRNOG00000015088	Prune2	0.0137883	-0.142113	0.100033
ENSRNOG00000013572	Lxn	0.0198358	-0.29619	-0.269717
ENSRNOG00000029500	Tapbp	0.0198358	0.362882	0.297952
ENSRNOG00000025757	Myh6	0.0251948	-0.217419	0.13322
ENSRNOG00000003927	Cd55	0.0319262	-0.324884	-0.142261
ENSRNOG00000008552	P2rx3	0.0319262	-0.131291	0.0696377
ENSRNOG00000027582	Dpysl4	0.0397049	-0.268653	-0.202794
ENSRNOG00000049560	Glul	0.0397049	0.319433	0.331193
